# Supplementary material for: A spectral standardization method based on plasma image-spectrum fusion to improve the stability of laser-induced breakdown spectroscopy
Source: Royal Society of Chemistry journal article supplement (doi:10.1039/d3ja00266g), 2023-01-01
Supplement: d3ja00266g1.pdf [file d3ja00266g1.pdf]

Supplement Material

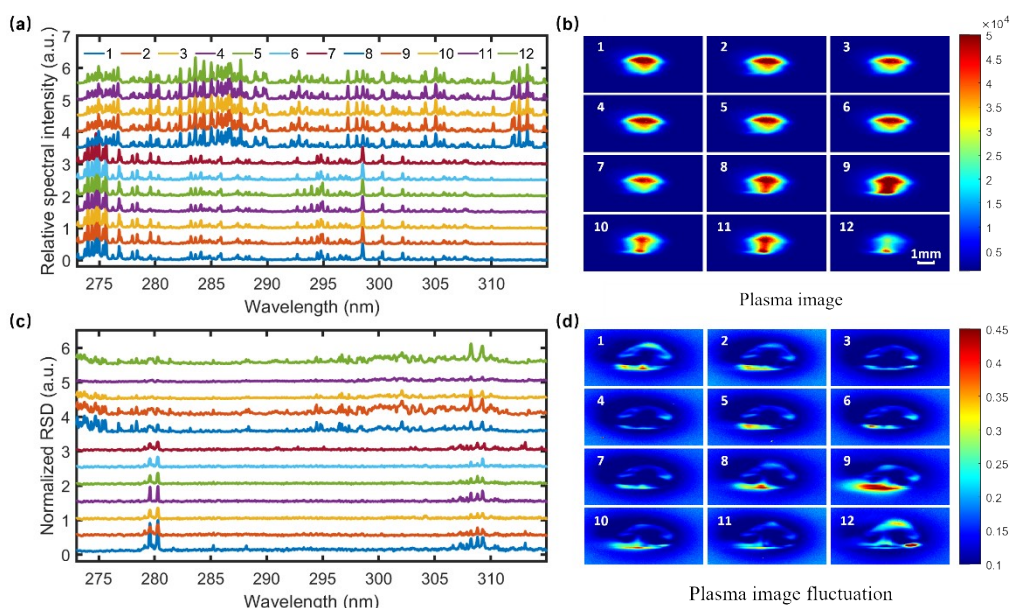

**Figure 1.** (a) LIBS spectra, (b) plasma images and (c), (d) their normalized RSD of alloy steel samples

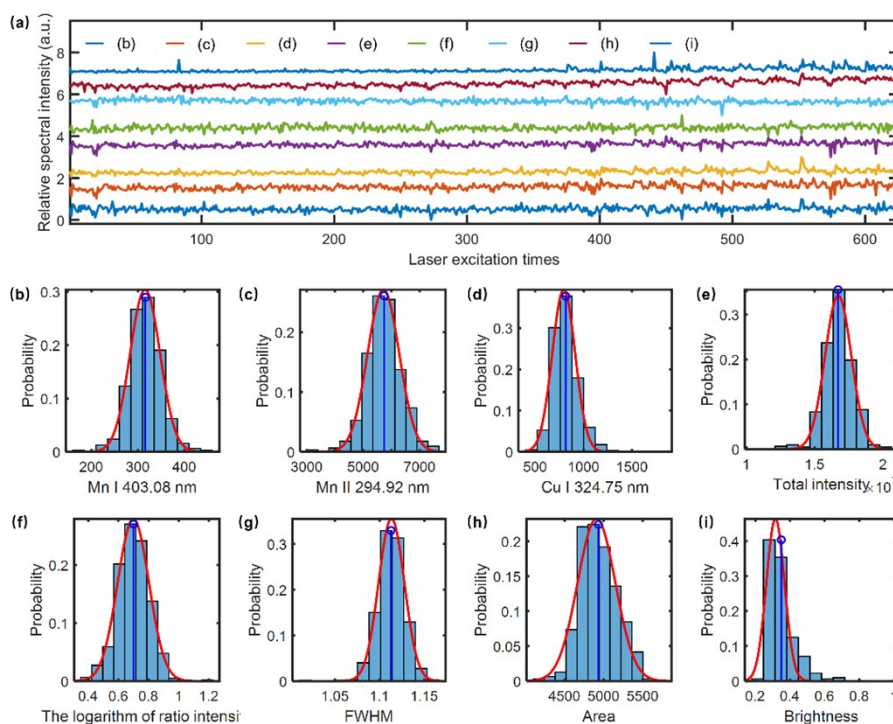

**Figure 2.** (a) Line graph and (b) - (i) probability distribution histograms of the intensities of Mn I 403.08 nm, Mn II 294.92 nm and Cu I 324.75 nm, total intensity, logarithm of intensity ratio of Fe I 248.33 nm to Fe I 373.49 nm, FWHM of H I 656.29 nm, area and brightness of plasma images

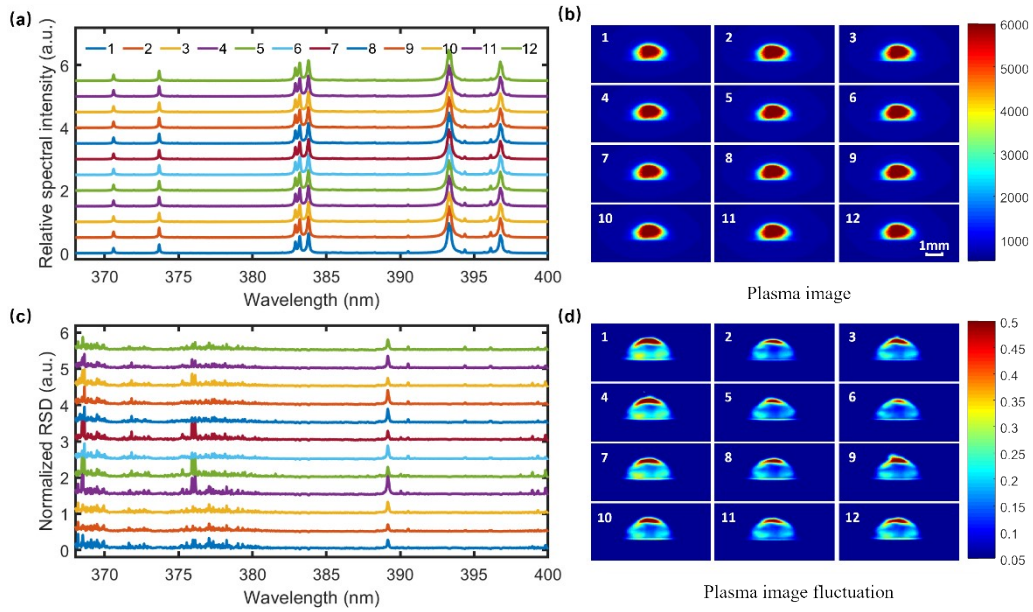

**Figure 3.** (a) LIBS spectra, (b) plasma images and (c), (d) their normalized RSD of ore pressed samples

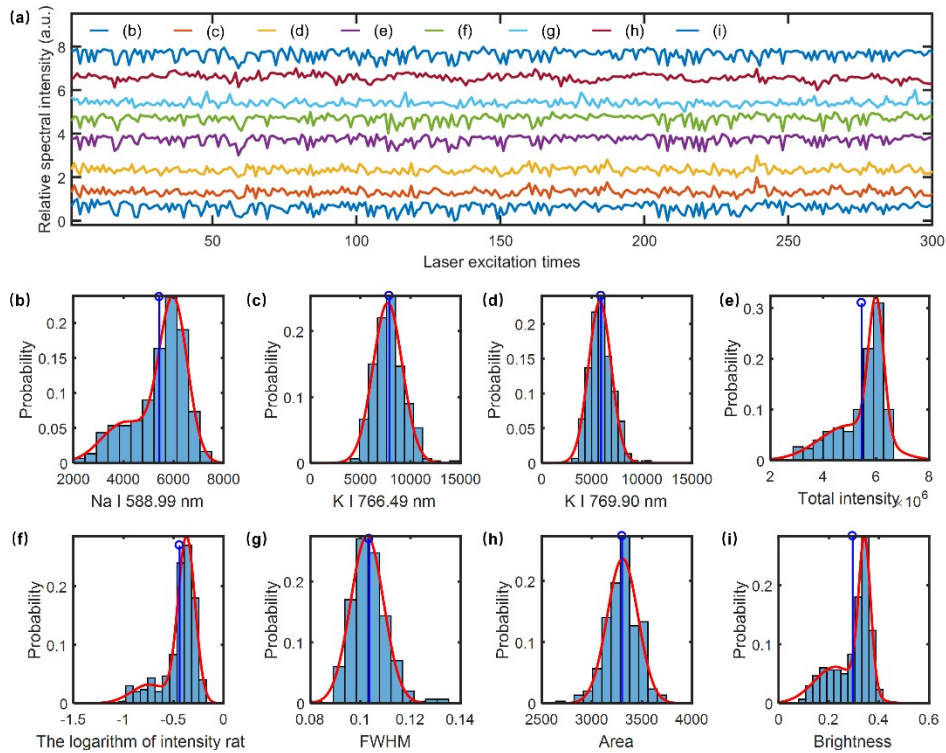

**Figure 4.** (a) Line graph and (b) - (i) probability distribution histograms of the intensities of Na I 588.99 nm, K I 766.49 nm and K I 769.90 nm, total intensity, logarithm of intensity ratio of Ca II 315.89 nm to Ca II 854.21 nm, FWHM of H I 656.29 nm, area and brightness of plasma images
